# Supplementary material for: PdStuA Is a Key Transcription Factor Controlling Sporulation, Hydrophobicity, and Stress Tolerance in Penicillium digitatum
Source: MDPI journal article supplement (doi:10.3390/jof9090941), 2023-09-18
Supplement: s1 [file s1]

**Table S1 Verification primers for deletion vectors, complementation vectors, and mutants.**

| Primer Name       | Sequence(5'-3')                                 | Note                                         |
|-------------------|-------------------------------------------------|----------------------------------------------|
| <i>PdStuA</i> -DF | CATGCATGGTTGCCTAACTAGGCGCGCCTCGGTCGGAGTTCTCTTT  | <i>PdStuA</i> deletion                       |
| <i>PdStuA</i> -DR | GTAAAACGACGGCCAGTGCCAAGCTTGTGGTCTACGATGTGGTTATG |                                              |
| <i>PdStuA</i> -UF | ATGACCATGATTACGAATTCGAGCTCAGCCAGAAATAGTATCCCAC  |                                              |
| <i>PdStuA</i> -UR | ATGCGGCTCCACAGCTGCAGGTCGACGCTGGATAGATGACGTTTGA  |                                              |
| <i>PdStuA</i> -F  | ATGACCATGATTACGAATTCGAGCTCAGCCAGAAATAGTATCCCAC  | <i>PdStuA</i> complementation                |
| <i>PdStuA</i> -R  | CTCCACAGCTGCAGGTCGACTCTAGAGTAGCAGAAGCAGACGCAAC  |                                              |
| <i>PdStuA</i> -F  | TGTGCCTGTCAACGAGCCTA                            | PCR identification of deletion transformants |
| <i>PdStuA</i> -R  | AGAGTGGGTACAAGAGGTCG                            |                                              |
| <i>Hph</i> -F     | ATTTGTGTACGCCCAGAGT                             |                                              |
| <i>Hph</i> -R     | CTCTCGGAGGGCGAAGAATC                            |                                              |
| <i>neo</i> -F     | ATGATTGAACAAGATGGATTG                           |                                              |
| <i>neo</i> -R     | GCTCAGAAGAACTCGTCAAGAAG                         |                                              |

**Table S2 RT-qPCR primers used in this study.**

| Gene ID    | Gene description                                              | Primer Name     | Sequence(5'-3')         | Amplicon size | Note                                 |
|------------|---------------------------------------------------------------|-----------------|-------------------------|---------------|--------------------------------------|
| PDIP_18200 | Actin, gamma                                                  | <i>Actin</i> -F | TCCACTACTGCCGAGCGTGAAAT | 218 bp        |                                      |
|            |                                                               | <i>Actin</i> -R | CCGCCAGACTCAAGACCAAGAAC |               |                                      |
| PDIP_46840 | APSES transcription factor <i>stuA</i>                        | <i>StuA</i> -R  | ACCATCTGGCTCTCAGCAAC    | 183 bp        |                                      |
|            |                                                               | <i>StuA</i> -F  | AGATGGATGGTGCCCACAAG    |               |                                      |
| PDIP_05330 | Regulatory protein <i>brlA</i>                                | <i>BrlA</i> -R  | CTGCTCAGGTCCAACCATATC   | 202 bp        |                                      |
|            |                                                               | <i>BrlA</i> -F  | AGCTGGAACCTCTTCTTGGAATC |               |                                      |
| PDIP_20340 | Abacus                                                        | <i>AbaA</i> -R  | TCCTATGGGTCGGAGAAAAGT   | 219 bp        |                                      |
|            |                                                               | <i>AbaA</i> -F  | GCTGAGCCATGAACACTAGAT   |               |                                      |
| PDIP_44350 | Developmental regulatory protein <i>WetA</i>                  | <i>WetA</i> -F  | CCAAAGCAAGAATGGCGTATC   | 201 bp        | conidiophore-related gene expression |
|            |                                                               | <i>WetA</i> -R  | GATAGAGTCTTGCGTCGTACTG  |               |                                      |
| PDIP_53340 | Hydrophobin, putative                                         | <i>RodA</i> -R  | GCAACACTGACGTTTCGCTTC   | 136 bp        |                                      |
|            |                                                               | <i>RodA</i> -F  | CCAGAGTTGATGTCCGGTGGT   |               |                                      |
| PDIP_56430 | CAMP-dependent protein kinase pathway protein ( <i>Som1</i> ) | <i>Som1</i> -R  | TCTAGCTCGCAACAGCAACA    | 176 bp        |                                      |
|            |                                                               | <i>Som1</i> -F  | ACAGAGCCTTCAAGACGTGG    |               |                                      |
| PDIP_77720 | Catalase-peroxidase 1                                         | <i>katG</i> -R  | TGTCGGAAGCGAGCCCGAAG    | 205 bp        |                                      |
|            |                                                               | <i>katG</i> -F  | GTTCGCACCAGCGGGACTCT    |               |                                      |
| PDIP_63740 | Catalase                                                      | <i>CAT</i> -R   | CGCCTGGGCGGAAACTACGA    | 195 bp        |                                      |
|            |                                                               | <i>CAT</i> -F   | GATGACCGCGCCAGACCACT    |               |                                      |
| PDIP_05940 | Catalase                                                      | <i>catA</i> -R  | CCGAGATCGAGCAAGCGGCA    | 200 bp        | CAT-related gene expression          |
|            |                                                               | <i>catA</i> -F  | GGTTCCCATACCGTCGCGCT    |               |                                      |
| PDIP_67580 | Catalase B                                                    | <i>catB</i> -R  | GCAACGATCTCGCCGTTCGC    | 202 bp        |                                      |
|            |                                                               | <i>catB</i> -F  | GCAGACTGCAACTTCGCGCC    |               |                                      |
| PDIP_49640 | Transcription factor ( <i>Snd1/p100</i> ) (Cu/Zn)             | <i>Snd1</i> -R  | CGTGAGGTGGCTACTGTTGT    | 168 bp        |                                      |
|            |                                                               | <i>Snd1</i> -F  | CATTCCACGGCCTTCCTTCT    |               |                                      |
| PDIP_43140 | Superoxide dismutase (Mn)                                     | <i>sod1</i> -R  | AGACATCGCTGCTCAGATCG    | 149 bp        | SOD-related gene expression          |
|            |                                                               | <i>sod1</i> -F  | AGTCAATGGCTTGTGCCAGA    |               |                                      |

|            |                                                   |                 |                       |        |                                         |
|------------|---------------------------------------------------|-----------------|-----------------------|--------|-----------------------------------------|
| PDIP_70880 | Fe superoxide dismutase (Fe)                      | <i>sod2</i> -R  | CGTTCGACTTCTCCTGGACC  | 159 bp |                                         |
|            |                                                   | <i>sod2</i> -F  | CATCCGCATCGACGGTATCA  |        |                                         |
| PDIP_66470 | Superoxide dismutase (Mn/Inorganic ion transport) | <i>Sod3</i> -R  | TGAGTGCGTGGTATGTCTCG  | 151 bp |                                         |
|            |                                                   | <i>Sod3</i> -F  | TCGTCGCCAGCATCAGTATC  |        |                                         |
| PDIP_07640 | Chitin synthase A                                 | <i>ChsA</i> -R  | GCCGAAAAACTGCCCTCCGC  | 195 bp |                                         |
|            |                                                   | <i>ChsA</i> -F  | GACGGCACTGCGGAATCCCT  |        |                                         |
| PDIP_15450 | Chitin synthase B                                 | <i>ChsB</i> -R  | ACGCGCGAGACCGAGTTGTT  | 206 bp |                                         |
|            |                                                   | <i>ChsB</i> -F  | TTCAGCGTACGCGGGTGGAC  |        |                                         |
| PDIP_79220 | Chitin synthase, putative                         | <i>Chs2</i> -R  | TATGCCACAGGCGGGTGCTC  | 204 bp |                                         |
|            |                                                   | <i>Chs2</i> -F  | GTGCTGGCGGGTCGAGAGAG  |        |                                         |
| PDIP_26990 | Chitin synthase D                                 | <i>ChsD</i> -R  | CCGCAGGACGTGGAACCCT   | 198 bp | Chitin synthase-related gene expression |
|            |                                                   | <i>ChsD</i> -F  | TTCTGCTGGGTGGGTGAGCC  |        |                                         |
| PDIP_03360 | Chitin synthase F                                 | <i>ChsF</i> -R  | AGTGGTAGCGGGGAACCCT   | 192 bp |                                         |
|            |                                                   | <i>ChsF</i> -F  | CTGCCATTTCAGGCGGAGGCT |        |                                         |
| PDIP_46630 | Chitin synthase G                                 | <i>ChsG1</i> -R | TCTGTTTCAGCAGCAAGCGTA | 144 bp |                                         |
|            |                                                   | <i>ChsG1</i> -F | GTAGCGACGTAGGGAATCGG  |        |                                         |
| PDIP_24450 | Chitin synthase G                                 | <i>ChsG2</i> -R | CACCGCCCCCTTCCTACCACG | 198 bp |                                         |
|            |                                                   | <i>ChsG2</i> -F | GCATATCTGCGCAAGCCGCC  |        |                                         |
| PDIP_20480 | Chitotriosidase-1                                 | <i>Chi1</i> -R  | GGAATCTGTGCTCTGGGACC  | 141 bp |                                         |
|            |                                                   | <i>Chi1</i> -F  | CCCAAGCATGAGCGGTAGAT  |        |                                         |
| PDIP_53900 | Endochitinase 2                                   | <i>Chi2</i> -R  | AGTTCCAAACCTACCAGCGG  | 151 bp |                                         |
|            |                                                   | <i>Chi2</i> -F  | AAGAGGAAGGCAAGCCAGTC  |        |                                         |
| PDIP_53760 | Class III chitinase                               | <i>CTS3</i> -R  | GGCTTTGACTACCGTGAAC   | 204 bp |                                         |
|            |                                                   | <i>CTS3</i> -F  | CTTCTCCTGGGACACATAACC |        |                                         |
| PDIP_48740 | Class III chitinase                               | <i>Chi3</i> -R  | CCACATCTGCCGAGACAACT  | 153 bp | Chitinase-related gene expression       |
|            |                                                   | <i>Chi3</i> -F  | GGTCGTTGCCGAGGATAGAG  |        |                                         |
| PDIP_45890 | Chitinase                                         | <i>Chi</i> -R   | GTATGGCCGAGCGTTTACT   | 205 bp |                                         |
|            |                                                   | <i>Chi</i> -F   | CGCAATCTCAGGCGTATCA   |        |                                         |
| PDIP_83360 | Class V chitinase                                 | <i>Chi5a</i> -R | GCTGCGGCACACAATTATC   | 202 bp |                                         |
|            |                                                   | <i>Chi5a</i> -F | CCAAGAAGGATCGTCCGTAAA |        |                                         |

|            |                   |                 |                      |        |
|------------|-------------------|-----------------|----------------------|--------|
| PDIP_29770 | Class V chitinase | <i>Chi5b</i> -R | GACTGGGTGGTGGTATGTGG | 166 bp |
|            |                   | <i>Chi5b</i> -F | TTGGCATACTTGCTCTCGGG |        |

---

Note: The following RT-qPCR program was used: 1 cycle of 95 °C for 2 min; 40 cycles of 95 °C for 15 s, 60 °C for 1 min.
